1 **Genomic determinants of sympatric speciation of the *Mycobacterium***  
2 ***tuberculosis* complex across evolutionary timescales**

3

4 Álvaro Chiner-Oms<sup>1, #</sup>, Leonor Sánchez-Busó<sup>2, #</sup>, Jukka Corander<sup>2, 3, 4</sup>, Sebastien  
5 Gagneux<sup>5, 6</sup>, Simon Harris<sup>2</sup>, Douglas Young<sup>7</sup>, Fernando González-Candelas<sup>1, 8</sup>  
6 Iñaki Comas<sup>8, 9\*</sup>

7

8 <sup>1</sup>Unidad Mixta “Infección y Salud Pública” FISABIO-CSISP/Universidad de  
9 Valencia, Instituto de Biología Integrativa de Sistemas-I2SysBio, Valencia,  
10 Spain.

11 <sup>2</sup>Pathogen Genomics, Wellcome Trust Sanger Institute, Cambridge CB10 1SA,  
12 UK.

13 <sup>3</sup>Department of Biostatistics, University of Oslo, 0317 Oslo, Norway.

14 <sup>4</sup>Helsinki Institute of Information Technology (HIIT), Department of Mathematics  
15 and Statistics, University of Helsinki, 00014 Helsinki, Finland.

16 <sup>5</sup>Swiss Tropical and Public Health Institute, Basel, Switzerland.

17 <sup>6</sup>University of Basel, Basel, Switzerland.

18 <sup>7</sup>The Francis Crick Institute, 1 Midland Road, London NW1 1AT, UK.

19 <sup>8</sup>CIBER en Epidemiología y Salud Pública, Valencia, Spain

20 <sup>9</sup>Instituto de Biomedicina de Valencia, IBV-CSIC, Valencia, Spain.

21

22 # Contributed equally.

23 \*Corresponding author.

24

25 Word-count: 4,016

26

27 **ABSTRACT**

28

29 Models on how bacterial lineages differentiate increase our understanding on  
30 early bacterial speciation events and about the relevant niche-specific loci  
31 involved. In the light of those models we analyse the population genomics events  
32 leading to the emergence of the *Mycobacterium tuberculosis* complex (MTBC)  
33 from related mycobacteria species. Emergence is characterised by a combination  
34 of recombination events involving multiple core pathogenesis functions and  
35 purifying selection on early diverging loci. After the separation from closely related  
36 mycobacteria we identify the *phoR* gene, a transcriptional regulator involved in  
37 multiple aspects of MTBC virulence, as a key functional player subject to  
38 pervasive positive selection. First, during the early diversification of the MTBC,  
39 PhoR played a central role defining the host range of the various MTBC  
40 members. Later, following adaption to the human host, PhoR mediates host-  
41 pathogen interaction during human-to-human transmission. We thus show that  
42 linking pathogen evolution across evolutionary and epidemiological timescales  
43 lead to the identification of past and present virulence determinants of interest for  
44 biomedical research.

45 The increasing availability of population genomics data has allowed an improved  
46 understanding of genotypic and ecological differentiation among closely related  
47 bacteria<sup>1</sup>. Models emanating from these data predict that sympatric speciation  
48 among bacteria occupying the same ecological niche is more likely leaving many  
49 times measurable genetic signatures in extant genomes<sup>2,3</sup>. However, is still  
50 underexplored how these models apply to professional pathogens, particularly  
51 those characterized by an obligate association with their host species.

52 Species of the *Mycobacterium tuberculosis* complex (MTBC) cause devastating  
53 morbidity and mortality in humans and animals, which also leads to important  
54 economic losses<sup>4</sup>. The MTBC comprises a group of bacteria with genome  
55 sequences having an average nucleotide identity of greater than 99% and sharing  
56 a single clonal ancestor. This includes the predominantly human pathogens  
57 referred to as *Mycobacterium tuberculosis* and *Mycobacterium africanum* as well  
58 as a series of pathogens isolated from other mammalian species known as *M.*  
59 *bovis*, *M. pinnipedi*, *M. antelope*, *M. microti*, etc. Human-adapted tuberculosis  
60 bacilli show a strong geographic association, with some lineages and even  
61 sublineages being globally distributed (e.g. lineage 4) and others geographically  
62 restricted (e.g. lineage 5, 6, 7)<sup>5,6</sup>. It is assumed that the causes of this variable  
63 geographical distribution are both historical (e.g. trade, conquest, globalization)  
64 and biological (e.g. interactions with different human genetic backgrounds)<sup>6</sup>.  
65 There is limited transmissibility of animal-adapted strains in humans and,  
66 conversely, human-adapted strains transmit poorly among animals<sup>7</sup>. Despite the  
67 wide range of host species infected by the different members of the MTBC, there  
68 is a maximum of ~2,500 single nucleotide polymorphisms (SNPs) separating any  
69 two MTBC genomes<sup>8</sup>. The most closely-related bacteria that fall outside of the  
70 MTBC include isolates initially referred to as “smooth tubercle bacilli” and now  
71 referred to as *Mycobacterium canettii* (MCAN). MCAN strains differ from MTBC  
72 isolates by tens of thousands of SNPs<sup>9</sup>. MCAN strains have been isolated from  
73 the Horn of Africa, predominantly from children and often in association with  
74 extrapulmonary tuberculosis<sup>10</sup>. Genomic comparisons have identified gene  
75 content differences between MTBC, MCAN and other mycobacteria<sup>9,11</sup> as well as  
76 genetic differences in virulence-related loci<sup>12</sup>.

77  
78 Our understanding about the population genetics events mediating the  
79 divergence of the ancestor of the MTBC from an MCAN-like ancestral pool is far  
80 from complete. The availability of genome sequences from thousands of MTBC  
81 clinical strains as well as of closely relatives like MCAN enable us not only to  
82 identify molecular signatures of MTBC speciation events, but also to reveal  
83 known and new targets for biomedical research.

84

## 85 RESULTS

86 To explore this, we first analyzed the differentiation between MTBC and MCAN  
87 by searching for any hallmark of on-going recombination between and within  
88 these groups of strains. Previous reports have suggested that there might be  
89 limited but significant recombination among MTBC strains<sup>13</sup>. To maximize the  
90 chances of identifying potential ongoing recombination events within the MTBC,  
91 we screened a data set of 3,475 complete genome sequences of strains from  
92 global sources<sup>14</sup> and kept those that maximized the within-MTBC diversity (n =

93 1,591). These genomes are representative of the known geographic and genetic  
94 diversity of the MTBC (Supplementary Fig. 1). Among those genomes, we  
95 identified all the biallelic variant positions that were not related with known drug  
96 resistance genes and called them in all the strains. In addition, we identified  
97 potential false positive variant calls due to mapping errors. We detected 239  
98 positions possibly involved in mapping errors due to duplicated sequences,  
99 leaving a final set of 94,780 core variant positions in the MTBC.

100 From the 94,780 variant positions, we identified potential homoplastic sites, i.e.  
101 polymorphic sites showing signs of convergent evolution, by parsimony mapping.  
102 A total of 2,360 homoplastic sites were identified (2.5% of all variable sites).  
103 Convergence can arise as a result of recombination, selection or neutral  
104 processes. With these variant positions, we looked at consecutive runs of  
105 homoplastic sites in the genomes. The 2,360 homoplastic positions defined 97  
106 homoplastic runs (see Methods for definition of a homoplastic run). If the  
107 accumulation of homoplasies was due to recombination, we expect the variant  
108 positions involved in each consecutive run to share the same phylogenetic  
109 mapping. From the 97 homoplastic runs, we detected only 2 cases in which two  
110 variant positions shared phylogenetic congruence. The two regions accounted  
111 for 4 convergent variants (Supplementary Table 1) and affected strains from  
112 different MTBC lineages. Variants in positions 2195896 and 2195899 fell in the  
113 primary regulatory region of *mazE5*<sup>15</sup>. On the other hand, variants in positions  
114 2,641,161 and 2,641,163 fell in the intergenic region of *glyS* and Rv2358.  
115 Although we cannot discard possible recombination events, it is more likely that  
116 the two regions have been under positive selection, a mechanism known to lead  
117 to homoplastic variants accumulation in the MTBC<sup>16</sup>. In summary, this large-scale  
118 variant-by-variant analysis failed to identify on-going recombination between any  
119 of the 1,591 MTBC strains analyzed.

120  
121 As an additional method to identify possible on-going recombination, we  
122 evaluated linkage disequilibrium (LD) as a function of the distance between the  
123 94,780 core variant positions.  $R^2$  values were slightly higher at shorter distances,  
124 but high values of this parameter can arise when comparing variants with very  
125 different frequencies<sup>17</sup> as is revealed by the skewing of the site frequency spectra  
126 of the MTBC towards low frequency values (Fig. 1B). We also calculated  $D'$ . In  
127 this data set, as expected for a mostly clonal organism, LD measured by  $D'$   
128 remained at its maximum value, even when focusing at distant variant positions  
129 more than 5 Kb apart, suggesting very little or no ongoing recombination (Fig.  
130 1A).

131 To further validate these findings, we ran Gubbins with the same data set.  
132 Gubbins detects the accumulation of a higher than expected number of variants  
133 as a hallmark of possible recombination. We partitioned the 1,591 strain dataset  
134 into the different lineages and screened for possible tracks of recombination. This  
135 lineage-by-lineage analysis identified no potential recombination regions within  
136 lineages. Therefore, the three approaches used agreed in assigning a negligible  
137 role to recombination in the ongoing evolution of the MTBC.

138 Having established that recombination is not currently acting within the MTBC,  
139 we compared a representative data set of MTBC genomes (Comas 2013, n =

140 219) with 7 MCAN genomes to identify and quantify ongoing recombination within  
141 MCAN and between MCAN and the MTBC. From the 93,922 polymorphic sites  
142 identified, 22,718 were biallelic homoplasies (24.2%). The genomic distribution  
143 of variant positions and homoplasies was traced for both groups, showing very  
144 different landscapes (Fig. 2). A total of 22,464 (98.9%) of those homoplasies were  
145 only found among MCAN strains, representing almost half of the variability within  
146 this group (22,464/52,392 biallelic sites, 42.9%) which points to recombination as  
147 a main source of variability in MCAN. This fact is consistent with previous  
148 reports<sup>9</sup>. By contrast and as expected, a flat homoplastic profile was found for the  
149 219 MTBC strains, with a low occurrence of homoplasies (488/30,056 biallelic  
150 sites, 1.6%).

151 To test for ongoing recombination between MCAN strains and MTBC strains, we  
152 identified runs of homoplasies involving both groups. From the total 93,922  
153 variants when we put together MCAN and MTBC strains we found 522 variable  
154 sites (0.05% of the total) that were polymorphic in both groups, including 254  
155 biallelic homoplasies in the MTBC group. Phylogenetic mapping showed that  
156 these homoplasies mapped to the ancestral branch leading to the MTBC clade  
157 and did not involve any extant MTBC strain. These results indicate that  
158 recombination events were common between MCAN and the ancestor of the  
159 MTBC, but were absent during subsequent diversification of the MTBC.  
160 Consistently, Gubbins identified 990 potential recombinant segments, most of  
161 which mapped on branches involving only MCAN strains ( $n = 907$ ), thus  
162 corroborating that most homoplastic variants only involved MCAN strains. The  
163 remaining events mapped to the common branch of all the MTBC strains  
164 (Supplementary Fig. 2).

### 165 **Sympatric and stepwise emergence of the MTBC ancestor**

166 Our results show that recombination with closely related mycobacteria played a  
167 role in the emergence of the common ancestor of the MTBC. To gain a better  
168 insight into the distribution of genome variability in MCAN and the ancestor of the  
169 MTBC, we extracted all the variant positions that were homoplastic between the  
170 MTBC ancestor and any of the MCAN strains (7,700 positions). The MTBC  
171 ancestor genome showed a similar homoplasia profile to that of the MCAN strains  
172 (Fig. 2), suggesting that the ancestor of the MTBC speciated in sympatry with  
173 MCAN ancestral strains. Notably, both MCAN and the MTBC ancestor shared a  
174 peak around the CRISPR region, highlighting the dynamic nature of this region  
175 possibly as a result of common phage infections.

176 A Gubbins analysis including MCAN genomes and the most likely common  
177 ancestor of the MTBC revealed a total of 65 recombination events mapping to  
178 the branch leading to the MTBC (Supplementary Table 2). To explore whether  
179 these fragments reflected real recombination, a phylogeny was constructed with  
180 each of them. A comparison with the topology of the non-recombinant alignment  
181 (whole genome alignment subtracting the recombinant regions) using those  
182 recombinant regions with enough phylogenetic signal (Supplementary Fig. 3)  
183 revealed significant incongruence (SH test;  $p$ -value $<0.05$ , Supplementary Fig. 4,



184 Supplementary Table 3). Thus, both Gubbins and phylogenetic approaches  
185 indicated that these 65 regions are likely recombinant regions.

186 To test whether speciation of the MTBC ancestor occurred in one single episode  
187 or in multiple episodes over time, we analyzed the relative age of divergence of  
188 the recombination fragments from the MCAN closest clade using BEAST. Given  
189 the uncertainties about the timescale of MTBC evolution, the substitution rate of  
190 the non-recombinant fragment was estimated normalizing to an arbitrary age of  
191 the time since the Most Recent Common Ancestor (tMRCA) of the MTBC of 1  
192 (see Methods for details). We then used the inferred substitution rate to estimate  
193 the relative age of each recombinant fragment by using only variants that  
194 accumulated in the branch of the MTBC after the recombination event. Results  
195 show that the MTBC ancestor differentiated from MCAN sequentially (Fig. 3A).  
196 The estimated ages show large HPD intervals as expected from the low number  
197 of variant positions per fragment. Although the distribution of tMRCA for the  
198 fragments represents a continuum, we can still observe one peak marking  
199 “recent” events, just before the whole pathogen population became clonal, and  
200 another for “ancient” events, closer to the time of divergence from the MCAN  
201 group (Fig 3B).

202 If recombination played a major role in shaping the MTBC ancestral genome with  
203 regards to pathogenesis, we would expect some functions related to the  
204 interaction with the host to be affected. Indeed, we observed an enrichment in  
205 experimentally confirmed essential genes in the regions involved in the  
206 recombination, suggesting that recombination targeted important cell functions  
207 (Chi-square test;  $p$ -value  $< 0.01$ ). An enrichment analysis of Gene Ontology terms  
208 for the genes contained in these regions identified functions related with growth,  
209 and most specifically with growth involved in symbiotic interactions inside a host  
210 cell as significantly overrepresented (Binomial test; adj.  $p$ -value  $< 0,05$ ) (Fig 3C).  
211 Remarkably most of the genes involved have been implicated in cirulence using  
212 animal models of infection (see Discussion, Supplementary Table 4).

213 A sympatric model of speciation predicts that some parts of the genome will be  
214 involved in adaptation to a new niche. The hallmark would be the accumulation  
215 of variants differentiating the emerging species, at the genome-wide level or in a  
216 few loci, as a consequence of reduced recombination (i.e. incipient speciation of  
217 the region). We identified all of the variants that mapped to the MTBC ancestral  
218 branch and that had a different nucleotide in all the MCAN strains, the so called  
219 divergent variants (divSNPs). The landscape of divergent variants ( $n = 5,688$ , Fig.  
220 4) revealed that a total of 120 genes harbored more divergent variants than  
221 expected by chance ( $pFDR \leq 0.01$ ).

222 However, bacterial genomes are highly dynamic and different processes can  
223 contribute to the genetic make-up of extant species. Consequently, not all the  
224 detected regions necessarily result from pure divergence by accumulation of  
225 substitutions. Our phylogenetic analysis identified several genes in which divSNP  
226 were introduced by horizontal gene transfer ( $n = 12$ ) or by recombination to a  
227 MCAN not present in our dataset ( $n = 54$ ).

228 A total of 53 genes in the MTBC ancestral genome were highly divergent with  
229 respect to MCAN due to substitution events (Supplementary Table 5). While the  
230 genome-wide identified divSNPs might result from genetic drift or hitchhiking  
231 events associated with selection on other loci, the accumulation in only 53 genes  
232 suggests that those regions might have played an important role during the  
233 process of niche differentiation. In agreement, these 53 genes were significantly  
234 more conserved than the rest of the genome ( $dN/dS = 0.154$  vs genome average  
235  $dN/dS = 0.279$ , chi-squared p-value = 0.000). This result suggests that, despite  
236 the increased divergence from the MCAN strains, those 53 regions have been  
237 evolving under purifying selection. Alternatively, the accumulation of divergent  
238 variants could also represent hotspot regions for mutation. None of the genes  
239 showed a similar pattern of mutation accumulation in other MCAN (no overlap  
240 between the divSNPs probabilities distributions for these 53 genes and the rest  
241 of the genomes, t-test p-value < 0.05).

#### 242 **Regions under positive selection after the transition to obligate pathogen**

243 Having established that some divSNPs accumulate in genes under purifying  
244 selection, we screened for positive selection patterns to identify additional genes  
245 important in the transition from a newly emerged pathogen to a globally  
246 established pathogen. We first revisited the evolution of antigenic proteins. Those  
247 regions are recognized by the immune system and most of them are  
248 hyperconserved within the MTBC<sup>18,19</sup>. Interestingly, and in agreement with  
249 previous data from MCAN genomic analyses<sup>9</sup>, the  $dN/dS$  calculated in the branch  
250 of the ancestor showed a very similar pattern, with essential genes being more  
251 conserved than non-essential ones and T-cell epitopes being hyperconserved  
252 (Supplementary Fig. 5). Only nine divSNPs (5 synonymous and 4 non-  
253 synonymous) were found in T-cell epitopes regions, which is significantly less  
254 than expected by chance (Poisson distribution, p-value < 0.001).

255 Thus, antigenic regions do not show an altered pattern or intensity of selective  
256 pressure as one might expect after a speciation event. We then explored what  
257 other regions of the genome changed significantly in selective pressure by  
258 comparing the MTBC ancestor  $dN/dS$  and the actual  $dN/dS$  in extant populations.  
259 To look for robust  $dN/dS$  measures, we only took into account those genes with  
260 more than 3 synonymous variant positions and at least 1 non-synonymous variant  
261 position for each of the two sets. Due to the low number of divSNPs in individual  
262 genes, only 121 genes were evaluated. Consequently, although additional genes  
263 to those shown in the ensuing analyses may have changed the selection pattern  
264 or intensity, they cannot be evaluated properly (Supplementary Table 6). We  
265 were particularly interested in those genes with a drastic change from purifying  
266 ( $dN/dS < 1$ ) to diversifying or positive selection ( $dN/dS > 1$ ) or vice versa.

267 Most of the genes evaluated did not show any sign of changing selective pressure  
268 or pattern. However, when looking at the  $dN/dS$  variation data, three genes

269 appeared as outliers (as defined by Tukey<sup>20</sup>). Genes changing to evolve under  
270 positive selection after divergence from the MTBC ancestor were Rv2464c, a  
271 DNA glycosylase involved in DNA repair, and Rv0758, also known as *phoR*.  
272 Conversely, Rv0202c was under a stronger negative selective pressure following  
273 speciation. Notably, PhoR forms part of the PhoP/PhoR virulence regulation  
274 system<sup>21</sup>. In the branch leading to the MTBC ancestor, this gene was as  
275 conserved at the amino acid level, as other essential genes (Chi-square test; p-  
276 value 0.4721), but when we looked within the extant MTBC diversity, the gene  
277 was significantly less conserved at the amino acid level than essential genes  
278 (Chi-square test; p-value < 0.001).

### 279 **Positive selection on *phoR* linked to on-going selective pressures**

280 Given the known central role of PhoPR in MTBC virulence, we focused our  
281 attention on the new mutations found in PhoR by expanding our MTBC dataset  
282 to 4,593 human and five animal genomes. Using this expanded data set, we  
283 observed a total of 193 nonsynonymous mutations and 31 synonymous  
284 mutations in *phoR* (Fig. 6A). The average dN/dS for this gene was well above 1  
285 (dN/dS = 2.37), suggesting the action of positive selection. Codon-based tests of  
286 positive selection for *phoR* identified a higher dN/dS than expected by chance  
287 and at least two codons with strong evidence to be under positive selection  
288 (Supplementary Table 7). Additional evidence for the action of positive selection  
289 on this gene derives from the nonsynonymous mutations, among which we found  
290 34 homoplastic variants, which are strong predictors of positive selection in  
291 MTBC (Supplementary Table 8). Non-synonymous mutations significantly  
292 accumulated in the sensor domain (chi-square, p-value < 0.01), further  
293 corroborating that they are involved in the fine tuning of the PhoR sensitive  
294 function to the changing environment during infection (Fig. 6C).

295 All the new mutations identified in our analysis were found in human clinical  
296 isolates and mapped to relatively recent branches in the MTBC phylogeny (Fig  
297 6A). Thus, we reasoned that most mutations were associated with recent  
298 selective pressures as compared to the mutations found in the lineage 5, 6 and  
299 animal clade reported previously<sup>22</sup>. We tested whether novel *phoR* mutations are  
300 arising in clinical settings during infection and for their potential involvement in  
301 ongoing transmission. We used a population-based data set from Malawi<sup>23</sup> where  
302 more than 70% of the strains were collected during fifteen years and genome  
303 sequenced. We found 14 mutations (13 nonsynonymous and 1 synonymous) in  
304 *phoR* exclusive of the Malawi data set with *phoR* having a dN/dS of 3.93.  
305 Moreover, the mean relative age of the nonsynonymous *phoR* variants was  
306 significantly younger than that of other nonsynonymous variants in the dataset (t-  
307 test, p-value << 0.01) and the *phoR* variants from the Malawi data set were more  
308 recent than those *phoR* mutations from the reference dataset (t-test, p-value =  
309 0.01)(Fig. 6B). From the 13 nonsynonymous mutations in the Malawi dataset, 8  
310 were in terminal branches and were markers of recent transmission clusters.



311 Moreover, *phoR* mutations in the Malawi dataset involved larger transmission  
312 clusters (permutations test, p-value < 0.001). Taken together, these data indicate  
313 that novel *phoR* mutations arise during infection and propagate in on-going  
314 human-to-human transmissions in clinical settings.

315

## 316 **DISCUSSION**

317 We present evidence that the MTBC ancestor transitioned to an obligate  
318 pathogenic lifestyle in sympatry from a common genetic pool including the  
319 ancestor of extant MCAN strains. Specifically, we found common patterns of  
320 genome-wide recombination between the ancestral MTBC genome and the  
321 ancestors of extant MCAN strains. The high recombination rate between MCAN  
322 strains, including the MTBC ancestor, stands in sharp contrast to the strictly  
323 clonal population structure of extant MTBC strains. By analyzing events leading  
324 to the transition from a recombinogenic to a clonal organism, we have also been  
325 able to identify genomic regions under different selective pressures. Our results  
326 suggest that mutations in *phoR* have allowed the bacteria to adapt to different  
327 mammalian hosts and they still play an important role during infection and  
328 transmission in current clinical settings.

329 Population genomics data has led to the development and testing of different  
330 models of how different genetic clusters of the same species can arise in  
331 sympatry<sup>1,3,24</sup>. In the case of *Vibrio cholera*, an appropriate combination of certain  
332 virulence-associated variants, ecological opportunity and additional virulence  
333 factors mediated the successful transition of particular clones from an  
334 environmental to a pathogenic lifestyle<sup>25</sup>. Other known cases such as pathogenic  
335 *Salmonella*<sup>26</sup> or *Yersinia* species<sup>27</sup> may have followed a similar scheme. The  
336 MTBC represents an extreme case of clonal emergence associated to its obligate  
337 pathogenic lifestyle. Here, we have shown that, despite the high average  
338 nucleotide identity between MCAN and the MTBC, there is complete genomic  
339 isolation between them. There is now experimental evidence in the laboratory  
340 that genetic exchange between MCAN strains occurs easily but this is not the  
341 case between MCAN and the MTBC<sup>28</sup>. We have shown that there is no  
342 measurable on-going recombination among the MTBC strains based on our  
343 analysis of 1,591 genomes and in agreement with other recent evidence<sup>29,30</sup>.  
344 Recombination in natural populations depends both on the capacity of  
345 chromosomal DNA exchange between the two groups involved and on the  
346 ecological opportunity. The mechanisms, if any, on how the MTBC bacilli lost their  
347 capacity to recombine when the ancestral genetic pool showed very similar  
348 recombination patterns to MCAN strains remains to be elucidated. Ecological  
349 opportunity may also influence on the lack of opportunities of exchange between  
350 MTBC strains. Despite the occurrence of co-infections, the bacilli occupy mainly  
351 an intracellular lifestyle, thereby reducing the opportunities for genetic exchange.

352 We can only speculate on how the transition from a likely environmental or  
353 opportunistic pathogen to an obligate pathogen occurred, but our analysis has  
354 identified a series of non-random evolutionary events. Notably those events  
355 involve core pathogenesis genes. We have identified highly divergent regions in  
356 the MTBC ancestor compared to MCAN. The pattern of SNP accumulation  
357 suggests that those regions were important in the transition to a closer  
358 association with the host. In addition, recombination events in the branch leading  
359 to the MTBC ancestor affected essential genes as well as genic regions known  
360 to be involved in host-pathogen interaction. The *mymA* operon (Rv3083-Rv3089)  
361 is related to the production of mycolic acids and its disruption leads to an aberrant  
362 cell-wall structure. Importantly, knock-out studies<sup>31</sup> have shown that this operon  
363 is essential for growth in macrophages and spleen. Furthermore, the deletion of  
364 genes in this operon leads to a higher TNF-alpha production, highlighting their  
365 role on regulating host-pathogen interaction<sup>32</sup>. The other major operon identified  
366 in our analysis is the *mce1* operon<sup>33</sup>. *mce1* knock-out mutants are hypervirulent  
367 in a mice model of infection and lose the capacity of a proper pro-inflammatory  
368 cytokine production that is needed for the establishment of the infection<sup>34</sup> and  
369 granuloma<sup>33</sup>. How all these processes are mediated by *mce1* is still not clear  
370 pointing to *mce1* as a priority target for biomedical research.

371 Our analysis identified one gene, *phoR*, which is under positive selection in extant  
372 MTBC strains although it was under purifying selection in the MTBC ancestor.  
373 PhoR is the sensor component of the PhoPR two-component systems, which  
374 play a major role in MTBC pathogenesis<sup>35</sup>. Experiments with mutations identified  
375 in this study showed that the lipid composition of the membrane and the ESAT-6  
376 secretion, a major virulence factor in the MTBC, are affected<sup>22</sup>. Early mutations  
377 in *phoR* were linked to adaptation of the MTBC to different animal species. Here,  
378 we show that *phoR* continues to play a role in the ongoing adaptation of MTBC  
379 strains during human-to-human transmission. We speculate that recent *phoR*  
380 mutations help to fine-tune the immunogenicity of the pathogen during infection,  
381 allowing it to manipulate the host response and increase the chances of  
382 transmission. Given that PhoPR is involved in membrane composition<sup>36</sup>,  
383 mutations in this regulator might also be involved in the susceptibility to some  
384 antibiotics. However, antibiotic selection is an unlikely explanation for the oldest  
385 mutations in PhoPR as they likely predate antibiotic usage.

386 Thus, a model can be proposed in which recombination, together with acquisition  
387 of new genetic materia<sup>11,37</sup>, generated a favorable genetic background for the  
388 MTBC ancestor to occupy or increase its association to the mammalian host.  
389 Contrarily to *Vibrio cholerae*, in which pandemic strains have emerged from the  
390 environment multiple times<sup>25</sup>, we see this emergence only once in the MTBC,  
391 perhaps because the right combination of multiple, fortuitous genetic events and  
392 ecological conditions has only happened once. More provocative is the idea that  
393 MTBC might just be part of a spectrum of association to the host occupied by the

394 different MCAN-MTBC groups. The fact that the so-called Clone A MCAN strains  
395 are more common in the clinic may suggest differences in ecological niches within  
396 the MCAN group itself<sup>38</sup>. In agreement, previous publications<sup>9,39</sup> and our own  
397 analysis (Figure 2) have identified Clone A strains as the evolutionary closest  
398 MCAN group to MTBC.

399 In the MTBC, the stronger, obligate association with new host(s) was  
400 accompanied by new selective pressures. In accordance, we have identified  
401 genes in the MTBC genome highly diverging from MCAN and evolving under  
402 purifying selection, suggesting that they have become essential following MTBC's  
403 transition to an obligate pathogenic life-style. In the final stages of adaptation,  
404 positive selection on genes such as *phoR* and others<sup>39,40</sup> led to a narrowing of  
405 the host-range and later still to a further fine-tuning during the spread of the  
406 bacteria within the new host species.

407

## 408 **ACKNOWLEDGEMENTS**

409 We thank Alberto Marina for advice in the interpretation of the PhoR molecular  
410 structure. This work was funded by projects the European Research Council  
411 (ERC) (638553-TB-ACCELERATE) and Ministerio de Economía y  
412 Competitividad (Spanish Government) research grant SAF2016-77346-R (to IC).  
413 BFU2014-58656-R and BFU2017-89594-R from Ministerio de Economía y  
414 Competitividad (Spanish Government) and PROMETEO/2016/122 from  
415 Generalitat Valenciana (to FGC). ACO is recipient of a FPU fellowship from  
416 Ministerio de Educación y Ciencia FPU13/00913 (Spanish Government). Swiss  
417 National Science Foundation (grants 310030\_166687, IZRJZ3\_164171,  
418 IZLSZ3\_170834 and CRSII5\_177163), the European Research Council (309540-  
419 EVODRTB) and SystemsX.ch (to SG).

420

## 421 **AUTHOR'S CONTRIBUTION**

422 IC conceived this work. ACO, IC, LSB, SH, JC and FGC analyzed the data. ACO,  
423 IC, LSB, FGC wrote the first version of the draft. All authors critically reviewed  
424 and contributed to the final version of the manuscript.

## 425 **DATA AVAILABILITY**

426 The data that support the findings of this study are available from the  
427 corresponding author upon reasonable request.

428 **REFERENCES**

- 429 1. Vos, M. A species concept for bacteria based on adaptive  
430 divergence. *Trends Microbiol.* **19**, 1–7 (2011).
- 431 2. Shapiro, B. J. & Polz, M. F. Microbial speciation. *Cold Spring Harb.*  
432 *Perspect. Biol.* **7**, a018143 (2015).
- 433 3. Marttinen, P. & Hanage, W. P. Speciation trajectories in  
434 recombining bacterial species. *PLoS Comput. Biol.* **13**, e1005640  
435 (2017).
- 436 4. WHO | Global tuberculosis report 2017. *WHO* (2017).
- 437 5. Comas, I. *et al.* Out-of-Africa migration and Neolithic coexpansion of  
438 *Mycobacterium tuberculosis* with modern humans. *Nat Genet* **45**,  
439 1176–1182 (2013).
- 440 6. Stucki, D. *et al.* *Mycobacterium tuberculosis* lineage 4 comprises  
441 globally distributed and geographically restricted sublineages. *Nat.*  
442 *Genet.* **48**, 1535–1543 (2016).
- 443 7. Davies, P. D. O. Tuberculosis in humans and animals: are we a  
444 threat to each other? *J. R. Soc. Med.* **99**, 539–40 (2006).
- 445 8. Coscolla, M. & Gagneux, S. Consequences of genomic diversity in  
446 *Mycobacterium tuberculosis*. *Semin. Immunol.* **26**, 431–444 (2014).
- 447 9. Supply, P. *et al.* Genomic analysis of smooth tubercle bacilli  
448 provides insights into ancestry and pathoadaptation of  
449 *Mycobacterium tuberculosis*. *Nat. Genet.* **45**, 172–9 (2013).
- 450 10. Aboubaker Osman, D., Bouzid, F., Canaan, S. & Drancourt, M.  
451 Smooth tubercle bacilli: neglected opportunistic tropical pathogens.  
452 *Front. public Heal.* **3**, 283 (2015).
- 453 11. Veyrier, F., Pletzer, D., Turenne, C. & Behr, M. A. Phylogenetic  
454 detection of horizontal gene transfer during the step-wise genesis of  
455 *Mycobacterium tuberculosis*. *BMC Evol. Biol.* **9**, 196 (2009).
- 456 12. Brennan, P. J. Bacterial evolution: Emergence of virulence in TB.  
457 *Nat. Microbiol.* **1**, 15031 (2016).
- 458 13. Namouchi, A., Didelot, X., Schöck, U., Gicquel, B. & Rocha, E. P. C.  
459 After the bottleneck: Genome-wide diversification of the  
460 *Mycobacterium tuberculosis* complex by mutation, recombination,  
461 and natural selection. *Genome Res.* **22**, 721–34 (2012).
- 462 14. Coll, F. *et al.* A robust SNP barcode for typing *Mycobacterium*  
463 *tuberculosis* complex strains. *Nat. Commun.* **5**, 4812 (2014).

- 464 15. Cortes, T. *et al.* Genome-wide mapping of transcriptional start sites  
465 defines an extensive leaderless transcriptome in *Mycobacterium*  
466 *tuberculosis*. *Cell Rep.* **5**, 1121–31 (2013).
- 467 16. Mortimer, T. D., Weber, A. M. & Pepperell, C. S. Signatures of  
468 selection at drug resistance loci in *Mycobacterium tuberculosis*.  
469 *mSystems* **3**, e00108-17 (2018).
- 470 17. Hedrick, P. & Kumar, S. Mutation and linkage disequilibrium in  
471 human mtDNA. *Eur. J. Hum. Genet.* **9**, 969–972 (2001).
- 472 18. Comas, I. *et al.* Human T cell epitopes of *Mycobacterium*  
473 *tuberculosis* are evolutionarily hyperconserved. *Nat. Genet.* **42**,  
474 498–503 (2010).
- 475 19. Coscolla, M. *et al.* *M. tuberculosis* T cell epitope analysis reveals  
476 paucity of antigenic variation and identifies rare variable TB  
477 antigens. *Cell Host Microbe* **18**, 538–48 (2015).
- 478 20. Tukey, J. W. (John W. *Exploratory data analysis*. (Addison-Wesley  
479 Pub. Co, 1977).
- 480 21. Gonzalo-Asensio, J. *et al.* PhoP: a missing piece in the intricate  
481 puzzle of *Mycobacterium tuberculosis* virulence. *PLoS One* **3**,  
482 e3496–e3496 (2008).
- 483 22. Gonzalo-Asensio, J. *et al.* Evolutionary history of tuberculosis  
484 shaped by conserved mutations in the PhoPR virulence regulator.  
485 *Proc. Natl. Acad. Sci.* **111**, 11491–11496 (2014).
- 486 23. Guerra-Assunção, J. A. *et al.* Large-scale whole genome  
487 sequencing of *M. tuberculosis* provides insights into transmission in  
488 a high prevalence area. *Elife* **4**, (2015).
- 489 24. Shapiro, B. J. *et al.* Population genomics of early events in the  
490 ecological differentiation of bacteria. *Science* **336**, 48–51 (2012).
- 491 25. Shapiro, B. J., Levade, I., Kovacicova, G., Taylor, R. K. & Almagro-  
492 Moreno, S. Origins of pandemic *Vibrio cholerae* from environmental  
493 gene pools. *Nat. Microbiol.* **2**, 16240 (2016).
- 494 26. Bäumler, A. & Fang, F. C. Host specificity of bacterial pathogens.  
495 *Cold Spring Harb. Perspect. Med.* **3**, a010041 (2013).
- 496 27. McNally, A., Thomson, N. R., Reuter, S. & Wren, B. W. ‘Add, stir  
497 and reduce’: *Yersinia* spp. as model bacteria for pathogen evolution.  
498 *Nat. Rev. Microbiol.* **14**, 177–190 (2016).
- 499 28. Boritsch, E. C. *et al.* *pks5*-recombination-mediated surface  
500 remodelling in *Mycobacterium tuberculosis* emergence. *Nat.*  
501 *Microbiol.* **1**, 15019 (2016).



- 502 29. Mortimer, T. D. & Pepperell, C. S. Genomic signatures of distributive  
503 conjugal transfer among Mycobacteria. *Genome Biol. Evol.* **6**, 2489–  
504 2500 (2014).
- 505 30. Boritsch, E. C. *et al.* Key experimental evidence of chromosomal  
506 DNA transfer among selected tuberculosis-causing mycobacteria.  
507 *Proc. Natl. Acad. Sci. U. S. A.* **113**, 9876–81 (2016).
- 508 31. Cheruvu, M., Plikaytis, B. B. & Shinnick, T. M. The acid-induced  
509 operon Rv3083–Rv3089 is required for growth of *Mycobacterium*  
510 *tuberculosis* in macrophages. *Tuberculosis* **87**, 12–20 (2007).
- 511 32. Olsen, A. *et al.* Targeting *Mycobacterium tuberculosis* tumor  
512 necrosis factor alpha-downregulating genes for the development of  
513 antituberculous vaccines. *MBio* **7**, e01023-15 (2016).
- 514 33. Casali, N., White, A. M. & Riley, L. W. Regulation of the  
515 *Mycobacterium tuberculosis mce1* operon. *J. Bacteriol.* **188**, 441–  
516 449 (2006).
- 517 34. Shimono, N. *et al.* Hypervirulent mutant of *Mycobacterium*  
518 *tuberculosis* resulting from disruption of the *mce1* operon. *Proc.*  
519 *Natl. Acad. Sci.* **100**, 15918–15923 (2003).
- 520 35. Broset, E., Martín, C. & Gonzalo-Asensio, J. Evolutionary landscape  
521 of the *Mycobacterium tuberculosis* complex from the viewpoint of  
522 PhoPR: implications for virulence regulation and application to  
523 vaccine development. *MBio* **6**, e01289-15 (2015).
- 524 36. Walters, S. B. *et al.* The *Mycobacterium tuberculosis* PhoPR two-  
525 component system regulates genes essential for virulence and  
526 complex lipid biosynthesis. *Mol. Microbiol.* **60**, 312–330 (2006).
- 527 37. Orgeur M, Brosch R. Evolution of virulence in the *Mycobacterium*  
528 *tuberculosis* complex. *Curr Opin Microbiol.* **41**, 68-75 (2018).
- 529 38. Blouin, Y. *et al.* Progenitor *Mycobacterium canettii* clone responsible  
530 for lymph node tuberculosis epidemic, Djibouti. *Emerg. Infect. Dis.*  
531 **20**, 21–28 (2014).
- 532 39. Ates, L. S. *et al.* Mutations in *ppe38* block PE\_PGRS secretion and  
533 increase virulence of *Mycobacterium tuberculosis*. *Nat. Microbiol.* **3**,  
534 181–188 (2018).
- 535 40. Malone, K. M. *et al.* Comparative 'omics analyses differentiate  
536 *Mycobacterium tuberculosis* and *Mycobacterium bovis* and reveal  
537 distinct macrophage responses to infection with the human and  
538 bovine tubercle bacilli. *Microb. Genomics* **4**, (2018).
- 539 41. Walker, T. M. *et al.* Whole-genome sequencing for prediction of

- 540 Mycobacterium tuberculosis drug susceptibility and resistance: a  
541 retrospective cohort study. *Lancet. Infect. Dis.* **15**, 1193–1202  
542 (2015).
- 543 42. Schmieder, R. & Edwards, R. Quality control and preprocessing of  
544 metagenomic datasets. *Bioinformatics* **27**, 863–4 (2011).
- 545 43. Li, H. & Durbin, R. Fast and accurate long-read alignment with  
546 Burrows-Wheeler transform. *Bioinformatics* **26**, 589–95 (2010).
- 547 44. Li, H. *et al.* The sequence alignment/map format and SAMtools.  
548 *Bioinformatics* **25**, 2078–9 (2009).
- 549 45. Koboldt, D. C. *et al.* VarScan 2: somatic mutation and copy number  
550 alteration discovery in cancer by exome sequencing. *Genome Res.*  
551 **22**, 568–76 (2012).
- 552 46. Cingolani, P. *et al.* A program for annotating and predicting the  
553 effects of single nucleotide polymorphisms, SnpEff: SNPs in the  
554 genome of *Drosophila melanogaster* strain w1118; iso-2; iso-3. *Fly*  
555 (*Austin*). **6**, 80–92 (2012).
- 556 47. Feuerriegel, S. *et al.* PhyResSE: a web tool delineating  
557 *Mycobacterium tuberculosis* antibiotic resistance and lineage from  
558 whole-genome sequencing data. *J. Clin. Microbiol.* **53**, 1908–14  
559 (2015).
- 560 48. Stamatakis, A. RAxML-VI-HPC: maximum likelihood-based  
561 phylogenetic analyses with thousands of taxa and mixed models.  
562 *Bioinformatics* **22**, 2688–2690 (2006).
- 563 49. Letunic, I. & Bork, P. Interactive tree of life (iTOL) v3: an online tool  
564 for the display and annotation of phylogenetic and other trees.  
565 *Nucleic Acids Res.* **44**, W242-5 (2016).
- 566 50. Maddison, W. P. & Maddison, D. R. Mesquite: a modular system for  
567 evolutionary analysis. (2017).
- 568 51. Purcell, S. *et al.* PLINK: a tool set for whole-genome association  
569 and population-based linkage analyses. *Am. J. Hum. Genet.* **81**,  
570 559–75 (2007).
- 571 52. Team, R. C. R: a language and environment for statistical  
572 computing. (2015).
- 573 53. Darling, A. E., Mau, B. & Perna, N. T. progressiveMauve: multiple  
574 genome alignment with gene gain, loss and rearrangement. *PLoS*  
575 *One* **5**, e11147 (2010).
- 576 54. Croucher, N. J. *et al.* Rapid phylogenetic analysis of large samples  
577 of recombinant bacterial whole genome sequences using Gubbins.

- 578            *Nucleic Acids Res.* **43**, e15 (2015).
- 579    55.    Schmidt, H. A., Strimmer, K., Vingron, M. & von Haeseler, A. TREE-  
580            PUZZLE: maximum likelihood phylogenetic analysis using quartets  
581            and parallel computing. *Bioinformatics* **18**, 502–4 (2002).
- 582    56.    Bos, K. I. *et al.* Pre-Columbian mycobacterial genomes reveal seals  
583            as a source of New World human tuberculosis. *Nature* **514**, 494–  
584            497 (2014).
- 585    57.    Rambaut, A., Suchard, M., Xie, D. & Drummond, A. Tracer v1.6.  
586            (2014).
- 587    58.    Maere, S., Heymans, K. & Kuiper, M. BiNGO: a Cytoscape plugin to  
588            assess overrepresentation of Gene Ontology categories in biological  
589            networks. *Bioinformatics* **21**, 3448–3449 (2005).
- 590    59.    Shannon, P. *et al.* Cytoscape: a software environment for integrated  
591            models of biomolecular interaction networks. *Genome Res.* **13**,  
592            2498–2504 (2003).
- 593    60.    Storey, J. D. The positive false discovery rate: a Bayesian  
594            interpretation and the q-value . 2013–2035 (2003).
- 595    61.    Fedrizzi, T. *et al.* Genomic characterization of nontuberculous  
596            Mycobacteria. *Sci. Rep.* **7**, 45258 (2017).
- 597    62.    Lechner, M. *et al.* Proteinortho: detection of (co-)orthologs in large-  
598            scale analysis. *BMC Bioinformatics* **12**, 124 (2011).
- 599    63.    Sievers, F. *et al.* Fast, scalable generation of high-quality protein  
600            multiple sequence alignments using Clustal Omega. *Mol. Syst. Biol.*  
601            **7**, 539 (2011).
- 602    64.    Ota, T. & Nei, M. Variance and covariances of the numbers of  
603            synonymous and nonsynonymous substitutions per site. *Mol. Biol.*  
604            *Evol.* **11**, 613–9 (1994).
- 605    65.    Murrell, B. *et al.* FUBAR: a fast, unconstrained bayesian  
606            approximation for inferring selection. *Mol. Biol. Evol.* **30**, 1196–1205  
607            (2013).
- 608    66.    Murrell, B. *et al.* Gene-wide identification of episodic selection. *Mol.*  
609            *Biol. Evol.* **32**, 1365–1371 (2015).
- 610    67.    Saitou, N. & Nei, M. The neighbor-joining method: a new method for  
611            reconstructing phylogenetic trees. *Mol. Biol. Evol.* **4**, 406–425  
612            (1987).
- 613    68.    Pennell, M. W. *et al.* geiger v2.0: an expanded suite of methods for  
614            fitting macroevolutionary models to phylogenetic trees.

- 615            *Bioinformatics* **30**, 2216–2218 (2014).
- 616    69.    Finn, R. D. *et al.* The Pfam protein families database: towards a  
617            more sustainable future. *Nucleic Acids Res.* **44**, D279–D285 (2016).
- 618    70.    Letunic, I. & Bork, P. 20 years of the SMART protein domain  
619            annotation resource. *Nucleic Acids Res.* **46**, D493–D496 (2018).

## 620 FIGURE LEGENDS

621 **Fig. 1. No ongoing recombination within the MTBC** A) Linkage disequilibrium  
622 as a function of genetic distance detected in a representative sample of  
623 *Mycobacterium tuberculosis* complex strains (n = 1,591). B) Site frequency  
624 spectrum of MTBC strains using the 94,781 variant positions.

625 **Fig. 2. Genome-wide variant profiles vary between *M. canetti*, *M.*  
626 *tuberculosis* and the MTBC ancestor** A) Number of homoplasies (grey) as a  
627 function of the total number of variants detected (orange) in the MCAN dataset,  
628 in the branch leading to the MTBC most recent common ancestor and within the  
629 MTBC. Black dots indicate recombination events detected in the most recent  
630 common ancestor of the MTBC. B) Homoplastic variant positions mapping to the  
631 branch of the most recent common ancestor of the MTBC coincide with events  
632 detected by Gubbins (highlighted in yellow) and show correlated phylogenetic  
633 patterns within each event.

634 **Fig. 3. Past recombination between *M. canetti* strains and the MTBC  
635 ancestor** A) Relative age of the recombination fragments detected (black boxes).  
636 The red error bars represent the 95% highest probability density (HPD). The age  
637 was relativized from 0 to 1, being 0 the age of the non-recombinant fraction of the  
638 genome and 1 the highest value in the confidence intervals. B) Histogram  
639 distribution of the recombination fragments relative ages. C) Gene Ontology  
640 terms overrepresented in the coding regions contained in the recombinant  
641 fragments.

642 **Fig. 4. Divergent positions between the MTBC ancestor and *M. canetti*  
643 clade.** Average of divSNPs per 10 kb positions (green) as compared to the  
644 average of homoplastic variants (gray). Blue arrows above the distribution are  
645 genes that significantly accumulate more divSNPs.

646 **Fig. 5. Genes with differential selective pressures across the MTBC  
647 speciation stages.** Genes changing selective pressure in the branch of the  
648 MTBC ancestor as compared to extant MTBC strains. Red lines mark those  
649 genes being outliers of the dN/dS variation distribution.

650 **Fig. 6. *phoR* is under positive selection in human affecting strains.** A)  
651 Genome-based phylogeny calculated from a total of 4,598 clinical samples  
652 obtained from different sources. The synonymous and nonsynonymous variants  
653 found in are *phoR* mapped to the corresponding branch. Variants in internal  
654 branches affect complete clades which are coloured in the phylogeny.  
655 Homoplasies are marked in the outer circle of the phylogeny. B) Relative ages  
656 distribution of the *phoR* variants in the reference dataset from Coll *et al.*<sup>14</sup> and the  
657 transmission dataset<sup>23</sup> in comparison with the rest of the genome variants. C)  
658 Schematic view of PhoR with the aminoacid changes found across the 4,598  
659 samples dataset marked on it. Aminoacid changes are significantly more  
660 abundant in the sensor domain (p-value < 0,01).

661



## 662 METHODS

### 663 Datasets used

664 **Global collection 1 (1,591 isolates).** This collection was obtained from Coll *et*  
665 *al.*<sup>14</sup> who gathered it from different sources. We downloaded all the available  
666 FASTQ files associated to the following ENA accession numbers: ERP000192,  
667 ERP000276, ERP000520, ERP001731, ERP000111, SRP002589, ERP002611,  
668 ERP000436, SRA065095, ERP001885, ERP001567. A total of 3,475 genomes  
669 were downloaded, aligned to the reference and their variants extracted. The  
670 transmission clusters were analyzed (transmission event defined by less than 15  
671 SNPs) and a representative genome of each transmission cluster was kept. We  
672 ended with 1,591 strains, representative of the 7 lineages.

673  
674 **Transmission data set (1,646 isolates).** This data set was obtained from  
675 Guerra-Assunção *et al.*<sup>23</sup> It includes samples taken over a 15-year period in a  
676 district of Malawi. We downloaded all the available FASTQ files associated to the  
677 following ENA accession numbers: ERP000436 and ERP001072.

678  
679 **Global collection 2 (219 isolates).** This dataset from Comas *et al.*<sup>5</sup> represent a  
680 selected set of strains representing the known phylogenetic diversity of the  
681 human MTBC strains.

682  
683 **Global collection 3 (4,762 isolates).** This dataset was obtained by joining the  
684 global collection 1 and the transmission dataset described above, as well as the  
685 isolates obtained from Walker *et al.*<sup>41</sup>. To the fastq files obtained previously, we  
686 added the ones obtained from the accession numbers found in the supplementary  
687 material from Walker *et al.* A total of 7,977 genomes were put together, aligned  
688 to the reference and their variants extracted. In this case, the transmission  
689 clusters (<15 SNPs) were filtered out and only one representative strain of each  
690 cluster was kept. Also, we removed potential coinfections. Coinfections were  
691 assessed by looking at lineage/sub-lineage coexisting markers<sup>14</sup>. Samples with  
692 evidence of more than one variant were considered as possible co-infections and  
693 removed from ensuing analyses.

694  
695 ***Mycobacterium canettii* dataset.** Nine *M. canettii* draft genomes were  
696 downloaded from Genbank (CIPT 140010059, NC\_015848.1; CIPT 140070010,  
697 NC\_019951.1; CIPT 140060008, NC\_019950.1; CIPT 140070017,  
698 NC\_019952.1; CIPT 140070008, NC\_019965.1; CIPT 140070002,  
699 NZ\_CAOL00000000.1; CIPT 140070005, NZ\_CAOM00000000.1; CIPT  
700 140070013, NZ\_CAON00000000.1 and CIPT 140070007,  
701 NZ\_CAOO00000000.1). However, genomes from strains CIPT 140070010 and  
702 CIPT 140070017 were discarded because they showed a larger proportion of  
703 SNPs than expected, many of them potential sequencing errors.

704 **MTBC most likely ancestral genome.** The MTBC ancestor was derived in a  
705 previous publication<sup>18</sup>. This ancestor is H37Rv-like in terms of genome  
706 structural variants, but H37Rv alleles were substituted by those present in the  
707 inferred common ancestor of all MTBC lineages.

708

### 709 **FASTQ mapping and variant calling for the MTBC strains**

710 Fastq files were trimmed to remove low quality reads using prinseq<sup>42</sup> and aligned  
711 to the MTBC most likely ancestral genome<sup>18</sup> using BWA-mem algorithm<sup>43</sup>.  
712 Alignments with less than 20x mean coverage per base were filtered out. The  
713 variant calling was performed using samtools<sup>44</sup> and VarScan<sup>45</sup>. Due to the low  
714 variability found in *M. tuberculosis*, to avoid mapping errors and false SNPs a  
715 variant was filtered out if: i) it was supported by less than 20 reads; ii) it was found  
716 in a frequency of less than 0.9; iii) it was found near indel areas (10 bp window);  
717 or iv) it was found in areas of high accumulation of variants (more than 3 variants  
718 in a 10 bp defined window). Variants were annotated using SnpEff<sup>46</sup>. Variants  
719 present in PE/PPE genes, phages or repeated sequences were also filtered-out,  
720 as they tend to accumulate SNPs due to mapping errors. High quality variant calls  
721 were combined in a non-redundant variant list and used to retrieve the most likely  
722 allele at each strain to generate a variant alignment.

723

### 724 **Phylogenetic inference and parsimony mapping of SNPs**

725 In the Global-1 dataset we identified 140,239 variants following the steps defined  
726 above. As we wanted to identify nucleotide variants due to recombination events,  
727 a stricter filtering was applied to remove putative recombination signal due to  
728 polymorphisms introduced by other causes. Variants related with antibiotic  
729 resistance were obtained from PhyResSe<sup>47</sup> and were removed from the analysis.  
730 Also, non-biallelic variants were removed from the analysis. To avoid false  
731 positives, we also removed positions in which a variant was called in at least one  
732 strain but also with a gap in at least other strain. To identify variants coming from  
733 mapping errors we generated fragments of 50 bp downstream, upstream and  
734 midstream of the variant positions in the reference genome. With these  
735 fragments, we performed a BLAST search over the reference genome to check  
736 whether they mapped to other regions. Variants identified in reads that mapped  
737 to more than one region of the reference genome (query coverage per HSP over  
738 98% and percentage of identical matches between the query and the reference  
739 genome of 98%) were removed from the analysis.

740 The remaining variants (94,780) were used to infer a phylogenetic tree using  
741 RAxML<sup>48</sup> with the GTRCATI (GTR + optimization of substitution rates +  
742 optimization of site-specific evolutionary rates) model of evolution and  
743 represented with the iTOL software<sup>49</sup>. Variants were mapped to the phylogeny  
744 using the Mesquite suite<sup>50</sup>. Homoplastic variants were identified based on  
745 parsimony criteria. Using these homoplastic variant positions, we looked for  
746 homoplastic runs. A homoplastic run was defined if two (or more) homoplastic  
747 variants were found in the genome in correlative positions or with at least one  
748 variant between them. Variants present in the same homoplastic run were  
749 mapped on the phylogeny using Mesquite to look for coincident phylogenetic  
750 patterns.

751

## 752 **Linkage-disequilibrium calculation**

753 Using the filtered variant positions (94,780), we used the PLINK software<sup>51</sup> to  
754 calculate the linkage-disequilibrium statistics  $D'$  and  $R^2$ . To estimate these values,  
755 we took into account variants with a minimum frequency of 0.01 and we used a  
756 sliding window of 10 Kb. The results obtained were processed with R<sup>52</sup>. To plot  
757 the  $D'$  and  $R^2$  pattern by variant distance, we calculated average  $D'$  and  $R^2$  values  
758 for 50 bp sliding windows.

759

## 760 **Multiple alignment of *M. canettii* and MTBC**

761 Seven *M. canettii* draft genomes were aligned to each other and to the ancestor  
762 of MTBC using progressiveMauve<sup>53</sup>. The segmented alignment obtained in  
763 XMFA format was converted to a plain Fasta format using the MTBC ancestor as  
764 reordering reference with a custom Perl script. Positions with gaps in the  
765 reference sequence were removed from the final alignment, so the resulting  
766 aligned genomes had the same size than the reconstructed MTBC ancestor  
767 (4,411,532 Mb). The MTBC pseudogenomes reconstructed from mapping to the  
768 MTBC ancestor from the different datasets described above were concatenated  
769 to the *M. canettii* alignment obtained in the previous step for further analyses.

770

## 771 **Recombination analyses and phylogenetic evaluation**

772 Recombination was evaluated in the alignment containing 219 strains from MTBC  
773 and 7 *M. canettii* and in the one containing the MTBC ancestor and 7 *M. canettii*.  
774 First, repetitive regions (i.e. PPE/PGRS) were masked from both alignments and,  
775 second, recombination events were inferred using Gubbins<sup>54</sup>, which identifies  
776 clusters of high SNP density as markers.

777 Gubbins identify 70 potential recombinant regions in the alignment containing the  
778 7 *M. canettii* strains and the MTBC ancestor. Four of these regions were obviated  
779 as they fell in regions deleted in several *M. canettii* strains. One more region was  
780 removed from the analysis because it was extremely short (41 bp) and we did not  
781 obtain reliable results in the subsequent analysis.

782 For the remaining 65 fragments a phylogeny was calculated using RAxML<sup>48</sup> and  
783 applying the GTRCATI model. Also, a reference phylogeny was calculated with  
784 the same method using the complete genomes after subtracting these 65 regions.  
785 This reference phylogeny had the same topology as the one obtained from the  
786 complete genomes. To test for phylogenetic incongruence between the putative  
787 recombination fragments and the genome phylogeny we applied the Shimodaira-  
788 Hasegawa and Expected Likelihood Weight tests implemented in TREE-  
789 PUZZLE<sup>55</sup>.

790

## 791 **Dating analyses**

792 To infer the age of the 65 recombinant fragments we first reasoned that most of  
793 the mutations found were contributed by recombination and not by mutation once  
794 the fragment had been integrated in the genome. Thus, before dating the

795 fragments we first removed all the homoplastic variants with other MCAN strain  
796 found in the fragments. The final alignments for the 65 fragments consisted of  
797 only those variants accumulated after the recombination event. We then used the  
798 non-recombinant part of the genome to infer a substitution rate assuming two  
799 different dating scenarios published for the tMRCA<sup>5,56</sup>. We run BEAST for each  
800 fragment pre-specifying monophyletic groups and substitution rate based on the  
801 non-recombinant genome phylogenetic reconstruction. We used an uncorrelated  
802 log-normal distribution for the substitution rate in all cases and a skyline model  
803 for population size changes. We ran several chains of up to 10E6 generations  
804 sampling every 1E3 generations to ensure independent convergence of the  
805 parameters. Convergence was assessed using Tracer<sup>57</sup>. For both evolutionary  
806 scenarios, the results obtained were largely congruent and proportional to the  
807 age limit imposed for the MTBC ancestor. As there is controversy about the  
808 correct MTBC ancestor age, the results were transformed to relative ages for  
809 plotting the final results.

810

### 811 **Gene ontology enrichment analysis**

812 Genes present in the recombinant regions between *MCAN* and the MTBC  
813 ancestor were annotated using SnpEff<sup>46</sup>. A Gene Set Enrichment analysis (GSE)  
814 was performed to look for enriched gene functions in these regions. The BiNGO  
815 tool<sup>58</sup> was used to study the enrichment in certain functional categories  
816 comparing the most abundant terms in the recombinant regions in comparison  
817 with those contained in the complete annotation. The tool uses a hypergeometric  
818 test (sampling without replacement) and the BH correction for multiple testing  
819 comparisons. The Cytoscape program<sup>59</sup> was used to visualize the results.

820

### 821 **divSNP analysis**

822 From the *M.canetti* and MTBC ancestor alignment, we extracted those positions  
823 having one variant in all the *M.canetti* strains and another variant in the MTB  
824 ancestor. The divSNP frequency by nucleotide was calculated by dividing the  
825 total number of divSNPs (5688) by the total number of bases in the alignment.  
826 Next, the expected abundance of divSNPs for each gene was calculated by  
827 multiplying the nucleotide divSNP frequency by the number of nucleotides in each  
828 gene. From the expected and the observed divSNP abundance, we used a  
829 Poisson distribution to calculate the probability of having the observed divSNPs  
830 by chance for each gene. We selected genes having a pFDR  $\leq 0,01$  using the  
831 q-value Storey method<sup>60</sup>.

832 Complete mycobacterial genomes for reference strains<sup>61</sup> (Supplementary table 9)  
833 were downloaded from RefSeq and GenBank. The orthologous genes were  
834 calculated from the amino acid sequences and using the Proteinortho tool<sup>62</sup>. A  
835 gene was considered as orthologous if the BLAST analysis showed a minimum  
836 identity of 25%, a query coverage of 50% and a maximum e-value of 1E-05. The  
837 orthologous genes were aligned using Clustal-omega<sup>63</sup> and the phylogenies were  
838 constructed using RAxML and applying the PROTCATIAUTO model. The  
839 reference phylogeny was constructed using only the core genome (proteins

840 having orthologous in all the mycobacterial genomes downloaded) with RAxML  
841 using the same options as above. The reference and alternative phylogenies  
842 calculated with the orthologous for the divSNPs enriched genes were manually  
843 inspected to check for congruence.

844

#### 845 **dN/dS analysis**

846 The dN/dS statistics were calculated using the R statistical language<sup>52</sup>. The  
847 potential synonymous and non-synonymous substitution sites for each region  
848 were calculated using the SNAP tool<sup>64</sup>. The dN/dS ratio for each region was  
849 calculated as follows:

850

$$851 \frac{\text{Non – synonymous variants} / \text{Non – synonymoussites}}{\text{Synonymous variants} / \text{Synonymoussites}}$$

852

853 The dN/dS for the MTBC ancestor was calculated using the divSNPs while the  
854 dN/dS for the MTBC were calculated using the 94,780 SNPs defined as the core  
855 variant set. To look for a robust comparison between both ratios only genes  
856 having at least 3 synonymous and 1 non-synonymous variants were taken into  
857 account. To compare the dN/dS ratios, both were normalized by the genomic  
858 dN/dS for each category (0,24 for the MTBC ancestor and 0,62 for the MTBC).  
859 The difference between the dN/dS ratio was calculated by subtracting the MTBC  
860 dN/dS to that of the MTBC ancestor. The genes that account for the largest  
861 differences in the dN/dS were identified as outliers ( $Q2 - 1.5 * IQR$ ,  $Q3 + 1.5 * IQR$ )<sup>20</sup>  
862 of the differences distribution.

863

#### 864 ***phoR* positive selection analysis**

865 Positive selection over *phoR* was tested using FUBAR<sup>65</sup> and BUSTED<sup>66</sup>. FUBAR  
866 was run with 5 MCMC chains of length 10,000,000. 1,000,000 states were used  
867 as burn-in and a Dirichlet prior of 0.5. BUSTED was run with default parameters.

868 To study the potential effect of *phoR* mutations on transmission efficacy we used  
869 the data set from Guerra-Assunção *et al.*<sup>23</sup>. We identified SNPs in branches  
870 leading either to leaves or to transmission clusters. Transmission clusters were  
871 categorized in large, medium or small according to the number of isolates in the  
872 cluster (large = over 75<sup>th</sup> percentile, medium=between 25<sup>th</sup> and 75<sup>th</sup> percentile,  
873 small = under 25<sup>th</sup> percentile). Each gene was scored to check for accumulation  
874 of mutations in branches leading to large transmission clusters according to the  
875 expression:

876

$$877 \text{Score} = \text{Largeclusters} * 3 + \text{Mediumclusters}$$

878



879 Genes with high mutation rates have a higher number of polymorphisms that  
880 could lead to a larger score by chance. To test the probability of obtaining the  
881 observed score by chance, a permutation test was carried out 10,000 times. Each  
882 of the SNPs identified was reassigned randomly to the same branches and the  
883 score was recalculated for each gene. The expected score distribution for each  
884 gene was compared to the observed score to calculate the probability. This test  
885 was performed for transmission events defined at 10 SNPs.

886 The relative ages for the variant positions were calculated as node-to-tip  
887 distances. In order to have a common framework, a phylogeny was constructed  
888 including all the samples from the transmission dataset and from the reference  
889 dataset. The phylogeny was constructed using the Neighbour-Joining  
890 algorithm<sup>67</sup>. For each variant position we first identified the node in which the  
891 variant appeared. The node-to-tip distance was calculated afterwards for each  
892 node using the geiger package<sup>68</sup>. Distances were normalized to obtain a relative  
893 distance. Later, all the non-synonymous variants except the *phoR* polymorphisms  
894 were used as a reference set. The nonsynonymous *phoR* variants to be  
895 compared were categorized in two groups, those exclusive to the reference  
896 dataset<sup>14</sup> and those derived from the transmission dataset<sup>23</sup>.

897

#### 898 **PhoR structure representation**

899 The PhoR structure was inferred by using PFAM<sup>69</sup> and SMART<sup>70</sup>.

900

901 **FIGURES**

**A**

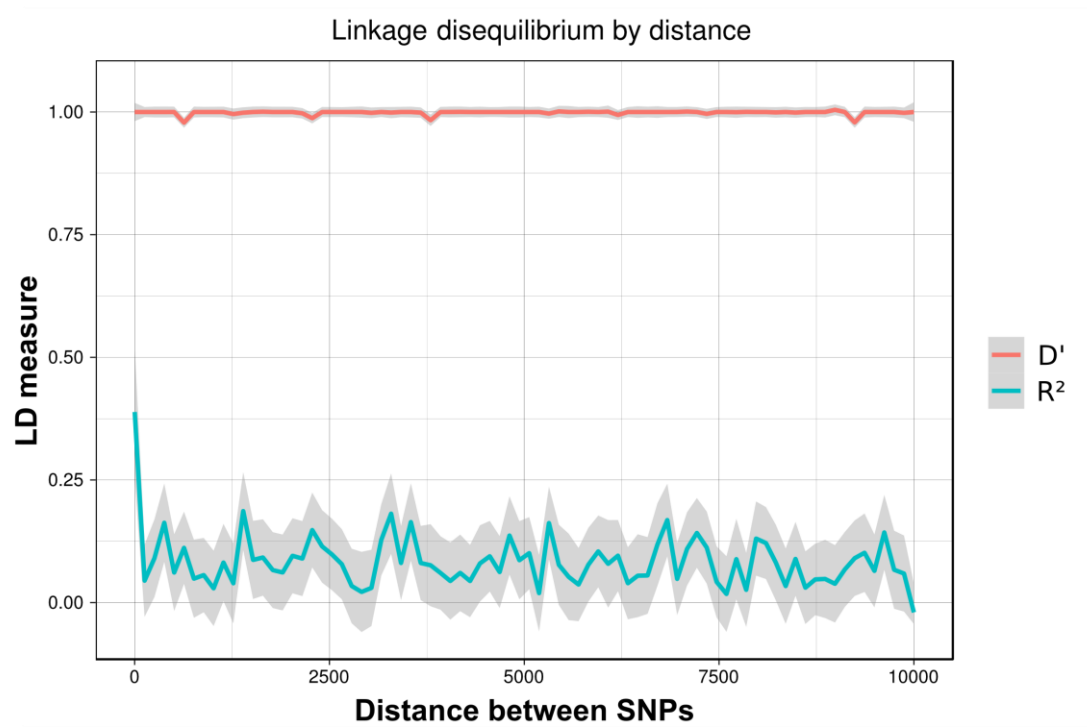

**B**

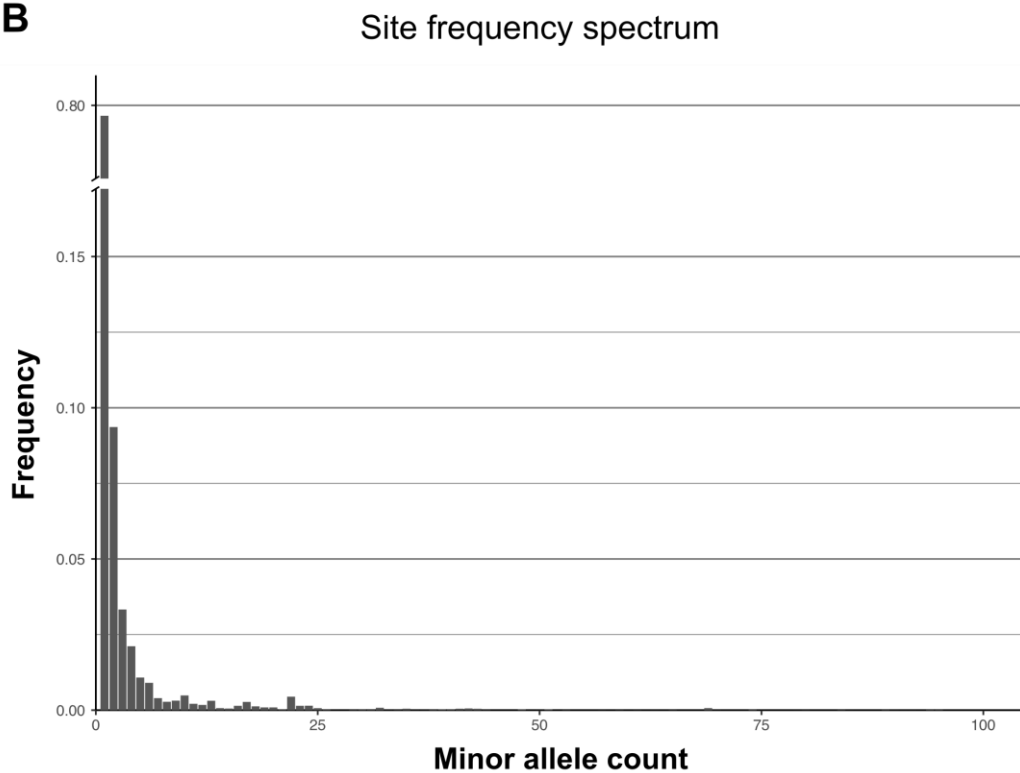

902 Figure 1

903

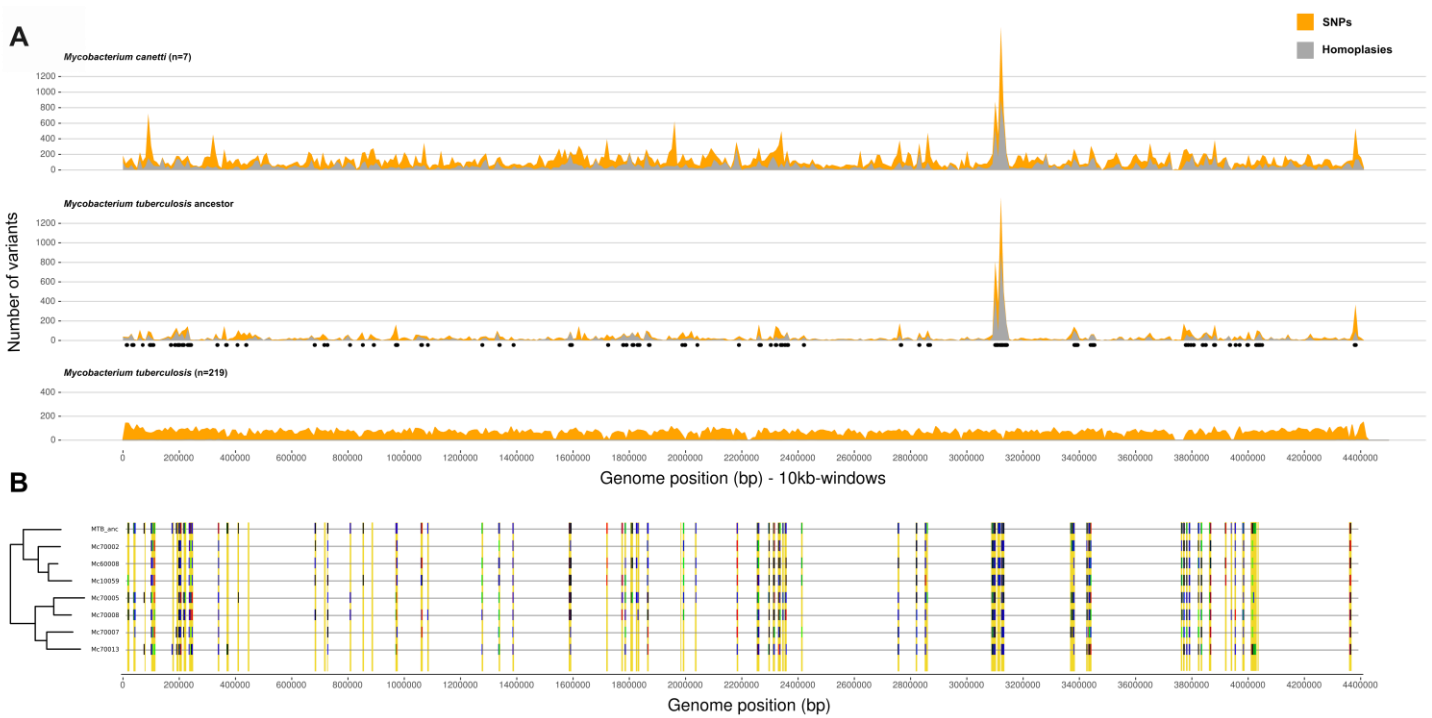

904 Figure 2

905

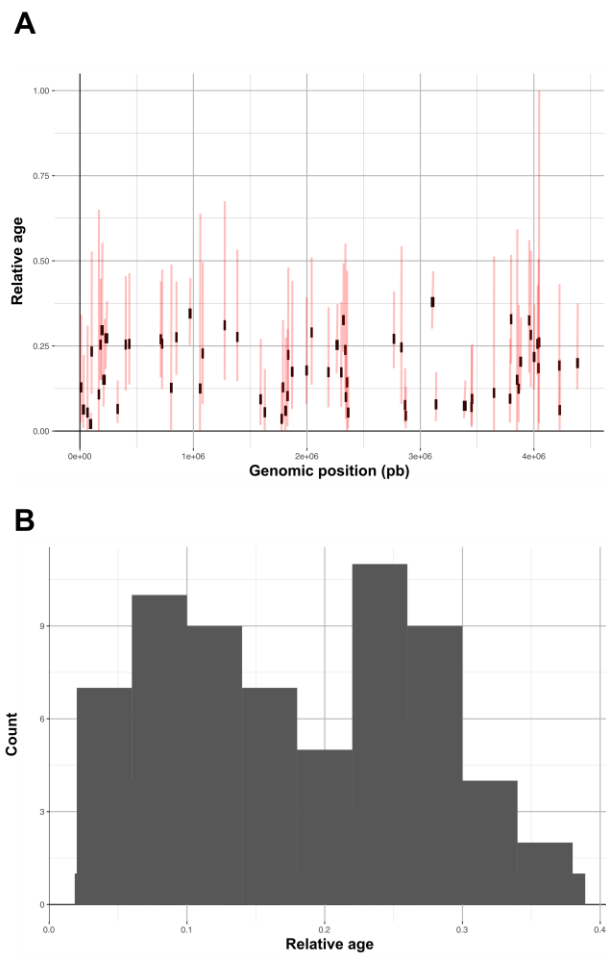

906 Figure 3

**C**

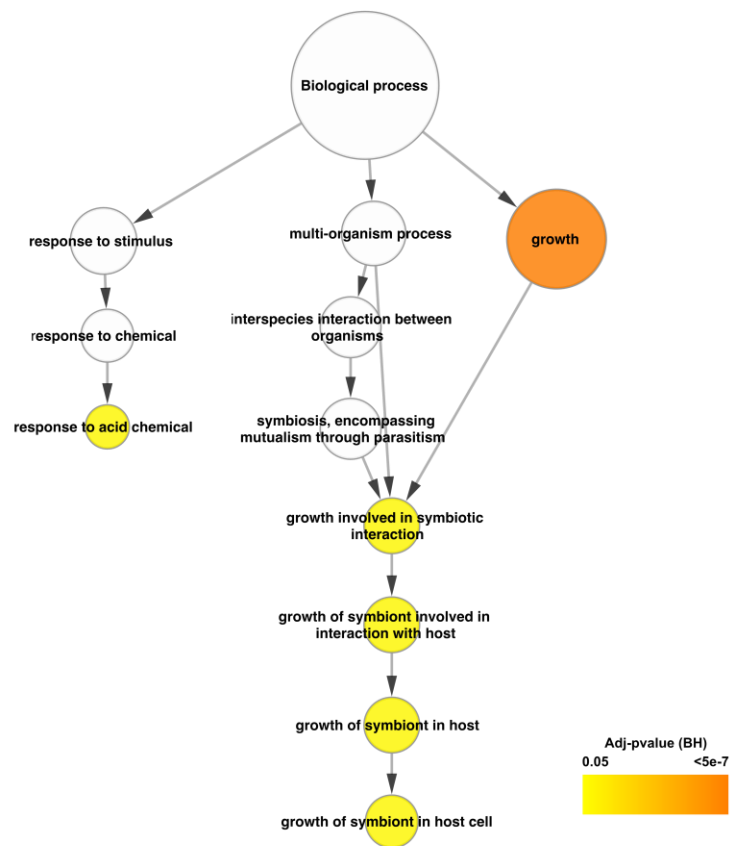

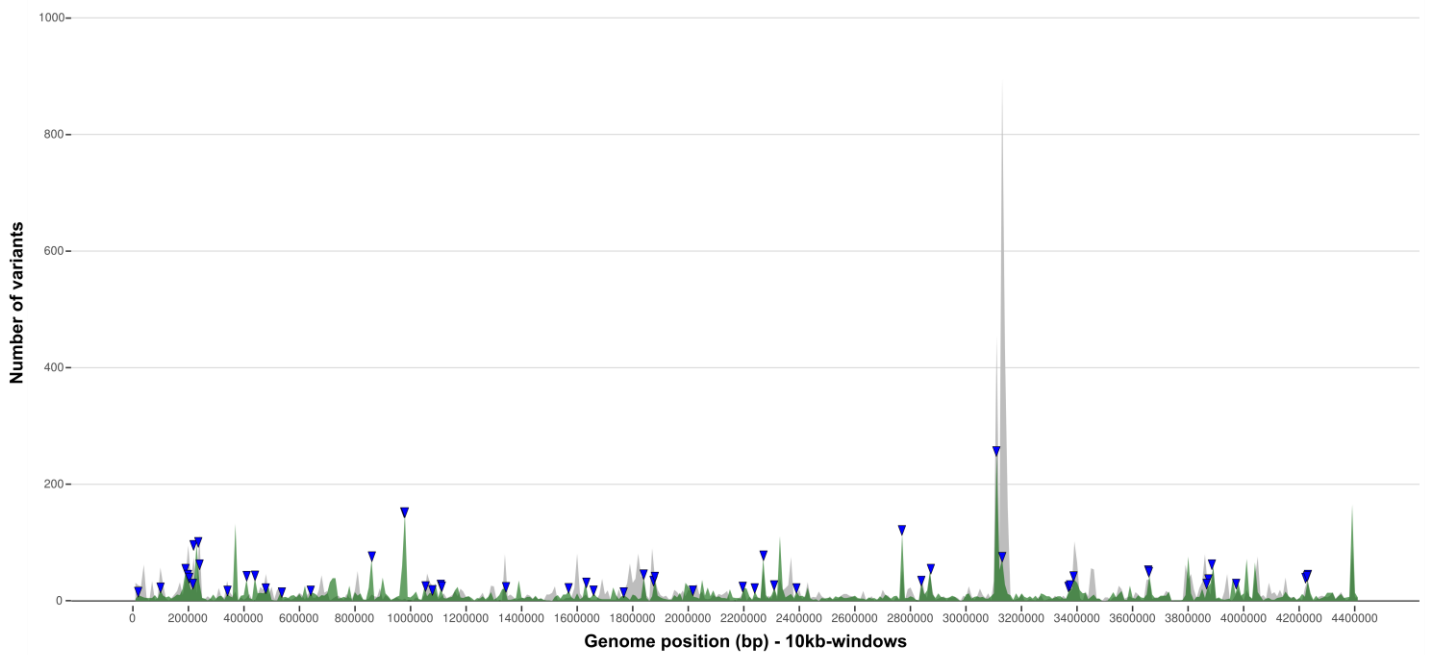

907 Figure 4

908

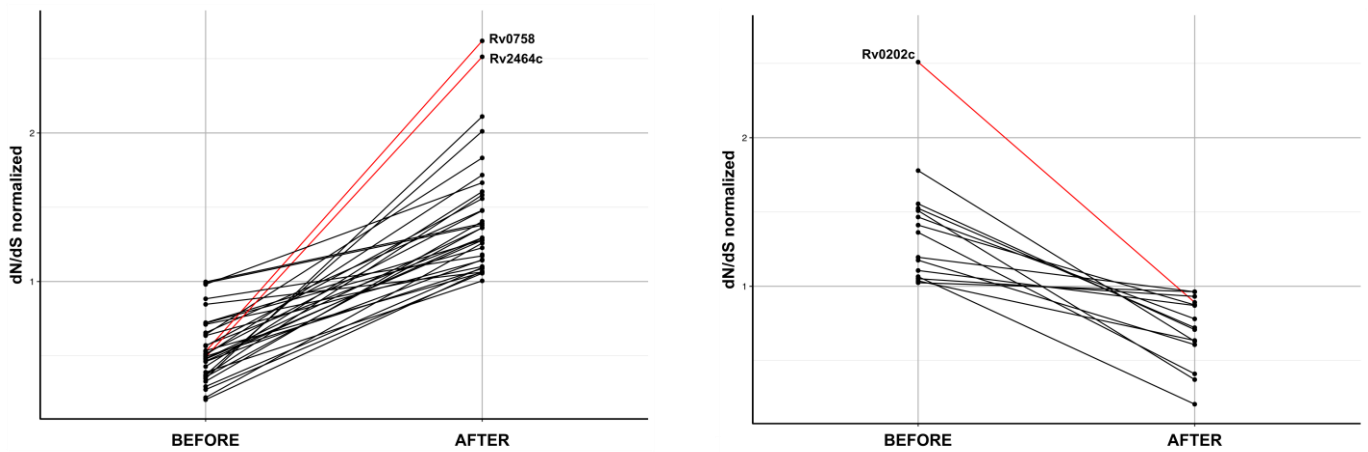

909 Figure 5

910

**A**

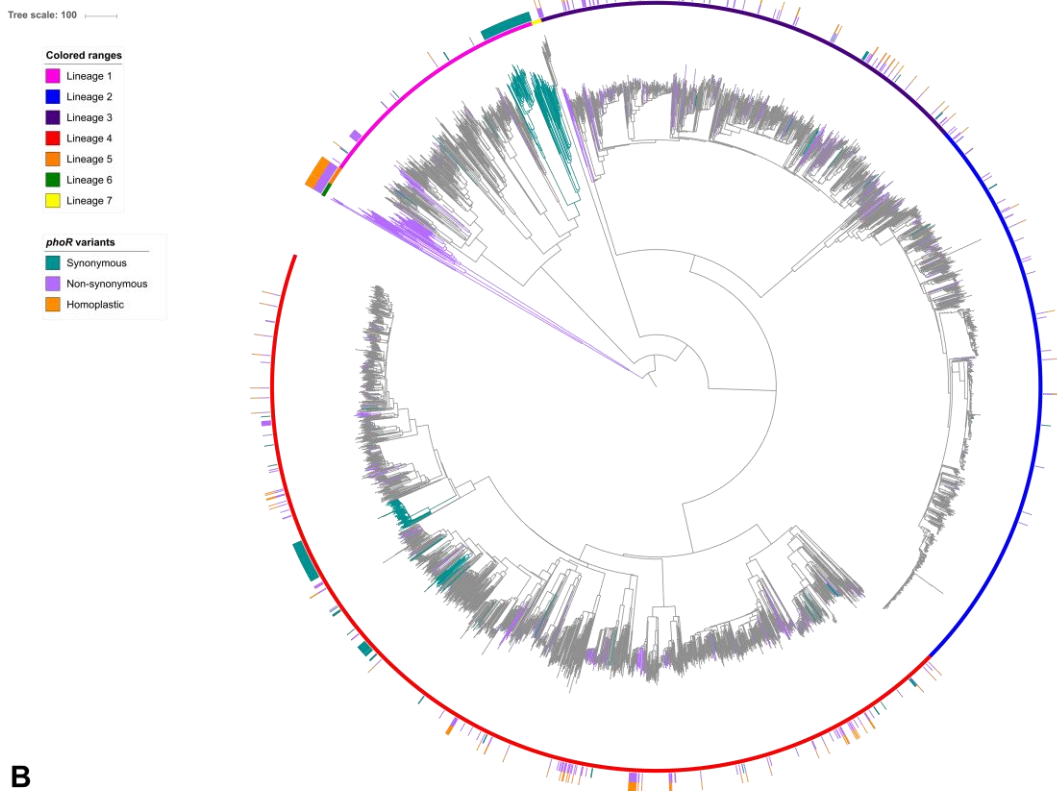

**B**

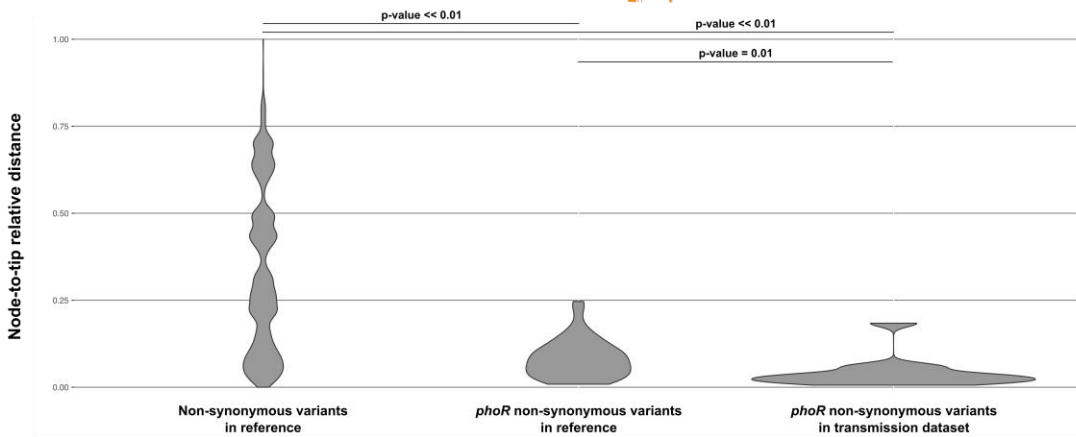

**C**

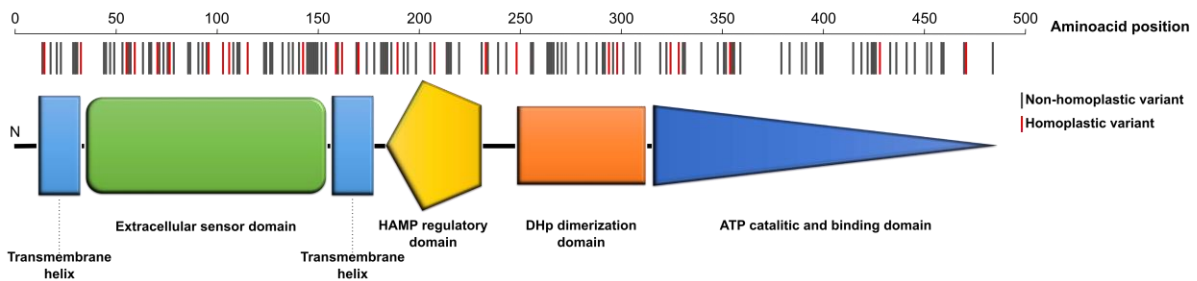

911 Figure 6
